# Supplementary material for: Health state utilities and subjective well-being among psoriasis vulgaris patients in mainland China
Source: Springer Nature journal article supplement (doi:10.1007/s11136-018-1819-2), 2018-02-28
Supplement: MOESM1 [file 15497776]

Health State Utilities and Subjective Well-being among Psoriasis Vulgaris Patients in Mainland China

Liu Liu1,2, Shunping Li1,2*, Yue Zhao3, Jianglin Zhang4, Gang Chen5

1. School of Health Care Management, Shandong University, Jinan, China.

2. Key Laboratory of Health Economics and Policy Research, NHFPC (Shandong University), Jinan, China.

3. Department of Dermatology, Heping Hospital, Changzhi Medical College, Changzhi, Shanxi, China.

4. Department of Dermatology, Xiangya Hospital, Central South University, Changsha, China.

5. Centre for Health Economic, Monash Business School, Monash University, Melbourne, Australia.

***** **Correspondence:** Shunping Li.

1. School of Health Care Management, Shandong University, Jinan, China.

2. Key Laboratory of Health Economics and Policy Research, NHFPC (Shandong University), Jinan, China. Email: [lishunping@sdu.edu.cn](mailto:lishunping@sdu.edu.cn)

**Journal name：**Quality of Life Research

**Supplementary Table 1 Health state utility scores and subjective well-being measures of different Psoriasis severities**

|  | N | EQ-5D-5L |  | TTO |  | SG |  | WHO-5 |
| --- | --- | --- | --- | --- | --- | --- | --- | --- |
| Mean (SD) | Mean (SD) | Mean (SD) | Mean (SD) |
| **Characteristics** | 343 | **0.90** (0.10) |  | **0.85** (0.15) |  | **0.88** (0.20) |  | **13.69** (5.81) |
| **PASI*** |  |  |  |  |  |  |  |  |
| <7 | 192 | 0.92 (0.09) |  | 0.88 (0.15) |  | 0.90 (0.21) |  | 14.54 (5.35) |
| 7-12 | 79 | 0.89 (0.11) |  | 0.82 (0.16) |  | 0.86 (0.20) |  | 12.57 (6.33) |
| >12 | 60 | 0.85 (0.13) |  | 0.80 (0.15) |  | 0.86 (0.18) |  | 11.95 (5.99) |

Note: *, the missing value of PASI was 12; SD, standard deviation; the differences between mild and severe severity patients had significantly based on three approaches (p<0.01).

| **Supplementary Table 2 How does EQ-5D-5L explain WHO-5** | | | |
| --- | --- | --- | --- |
| EQ-5D-5L dimensions | Level | Coefficient | SE |
| Mobility | 2 | -2.156* | (1.067) |
|  | 3 | 3.526 | (3.820) |
|  | 4 | 2.874 | (6.010) |
| Self-care | 2 | -1.888 | (1.920) |
|  | 3 | -6.329 | (5.252) |
| Usual activity | 2 | 0.117 | (1.055) |
|  | 3 | -0.858 | (3.134) |
| Pain | 2 | -0.118 | (0.631) |
|  | 3 | -1.637 | (1.007) |
|  | 4 | -4.147 | (2.366) |
| Anxiety | 2 | -4.136** | (0.626) |
|  | 3 | -5.475** | (1.018) |
|  | 4 | -10.532** | (2.076) |
| N |  | 343 |  |
| R-squared |  | 0.268 |  |
| Dependent variable is the WHO-5 well-being index. Independent variables are five EQ-5D-5L dimensions (with the first level in each dimension as the reference level). Standard errors (SE) in parentheses. ** p<0.01, * p<0.05. | | | |
